# Supplementary material
Source: PubMed Central journal article supplement (PMC3358761)
Supplement: ASN.2011080842_ASN2011080842SupplementaryData.pdf [file ASN.2011080842_ASN2011080842SupplementaryData.pdf]

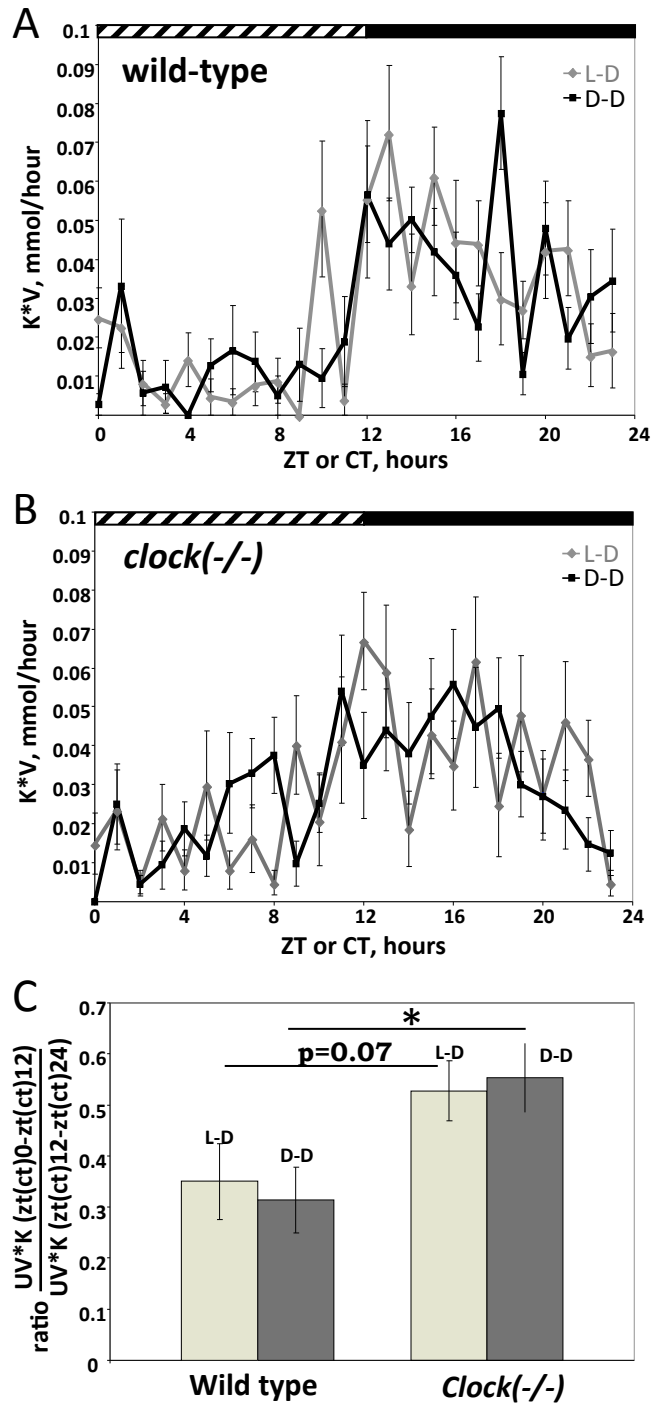

**Supplementary Figure 1.** **A.** Temporal profile of renal potassium excretion rates in wild-type mice in LD or DD conditions. Values are averages  $\pm$ SEM from n=11 mice. **B.** Temporal profile of renal potassium excretion rates in *clock(-/-)* mice in LD or DD conditions. Values are averages  $\pm$ SEM from n=11 mice. **C.** Ratio between potassium excreted during the day (ZT0-ZT12) and the night (ZT12-ZT24) in LD conditions or during the subjective day (CT0-CT12) and subjective night (CT12-CT24) in DD conditions (\*,  $p < 0.05$ , n=11). Statistical significance was calculated using unpaired *t*-test.

A

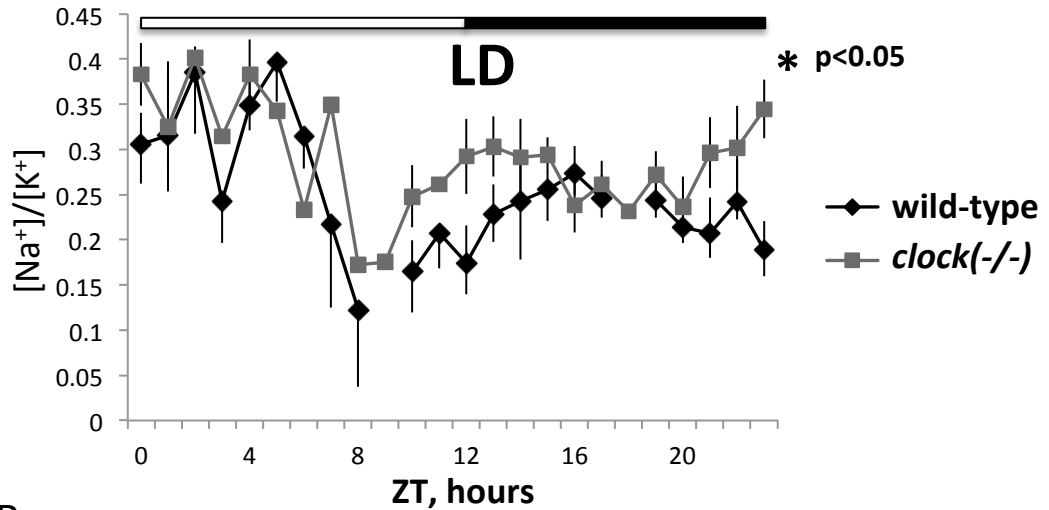

B

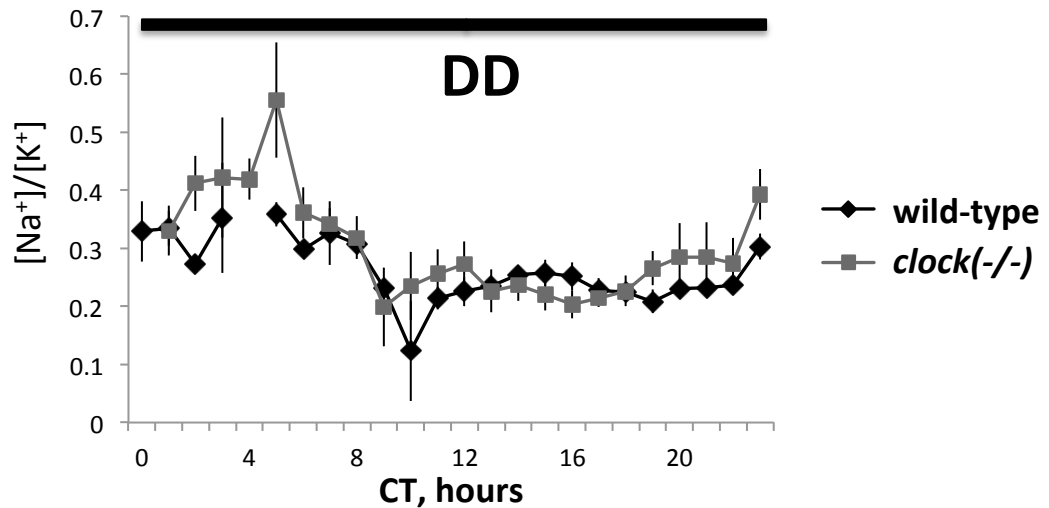

**Supplementary Figure 2.** A. Urinary  $\text{Na}^+/\text{K}^+$  ratio in LD conditions. Values are averages  $\pm$ SEM from  $n=11$  mice. B. Urinary  $\text{Na}^+/\text{K}^+$  ratio in DD conditions. Values are averages  $\pm$ SEM from  $n=11$  mice. Values for the  $\text{Na}^+/\text{K}^+$  ratio at ZT9 (LD, wild-type mice), ZT4 (DD, wild-type mice) and ZT0 (DD, *clock(-/-)* mice) are missing because none of the animals examined ( $n=11$ ) excreted detectable amounts of urine at these time-points.

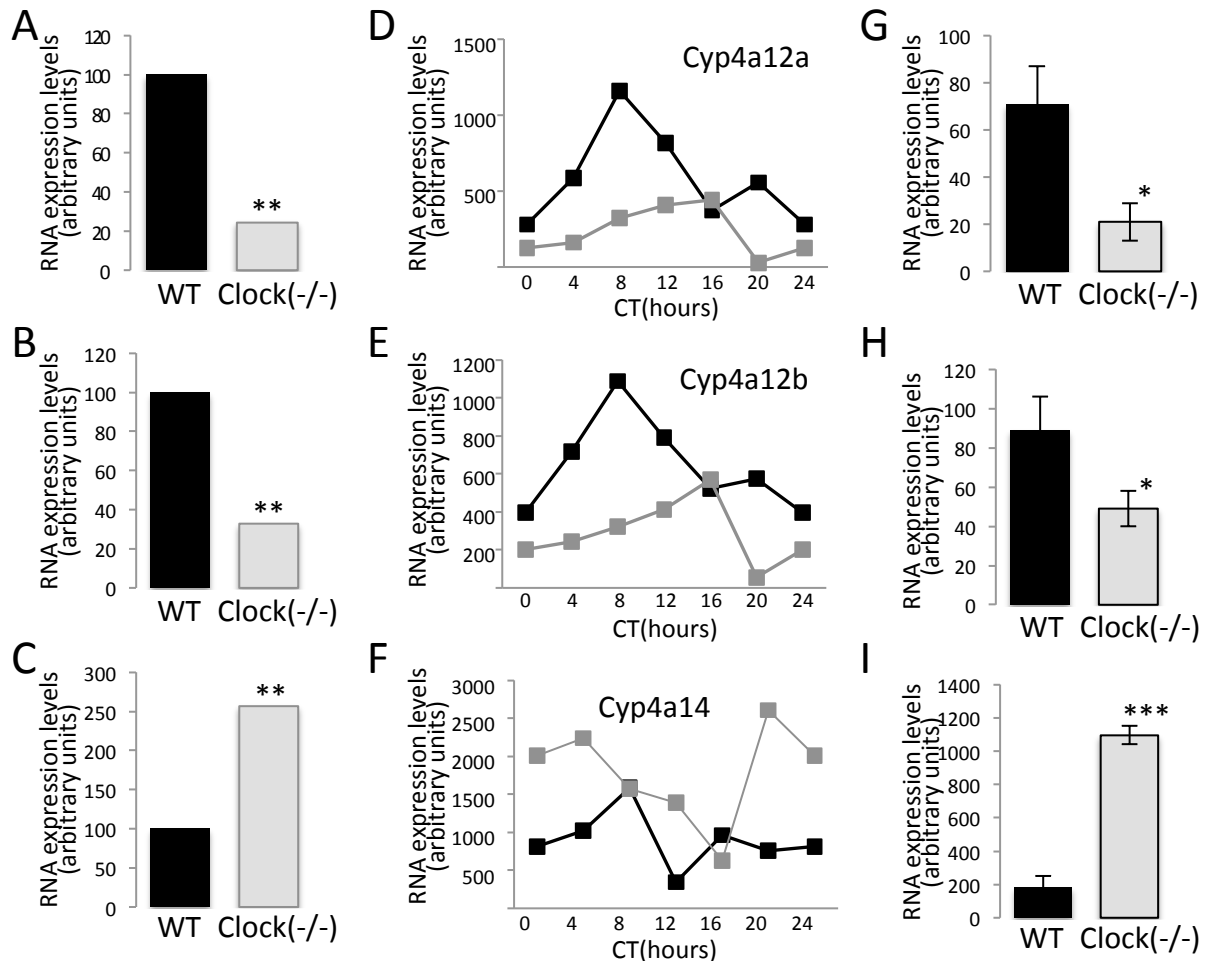

**Supplementary Figure 3.** Microarray analysis of Cyp4a12a, Cyp4a12b and Cyp4a14 RNA expression levels in kidneys of wild-type and *clock*(*-/-*) mice. Data presented in panels A, B and C are the 24-hour mean microarray hybridization signals for Cyp4a12a, Cyp4a12b and Cyp4a14, respectively. The RNA was extracted from whole kidneys of mice adapted to LD conditions for two weeks and then placed in constant darkness (DD) for 30 hours before sacrifice. Temporal expression profiles of Cyp4a12a, Cyp4a12b and Cyp4a14 in kidneys of wild-type (black line) and *clock*(*-/-*) (grey line) mice are shown in panels D, E and F, respectively. Data presented in panels D, E and F are means of microarray hybridization signals obtained from two biological replicates. Each biological replicate was composed of equimolar amounts of RNA extracted from 2 or 3 mice (see Supplementary Methods). Statistical analysis of microarray hybridization data was performed according to a standard protocol (see Supplementary Methods). \*\* -  $p < 0.01$ . Data presented in panels G, H and I show qPCR-based quantitation of 24-hour mean Cyp4a12a, Cyp4a12b and Cyp4a14, expression levels in RNA samples extracted from the kidneys of mice maintained in the 12h:12k light-dark (LD) conditions. Values are means  $\pm$ SEM from  $n=30$  mice. Statistical significance was calculated using unpaired *t*-test. \*,  $p < 0.05$ ; \*\*,  $p < 0.01$ ; \*\*\*,  $p < 0.001$ .

**Supplementary Table 1.** Circadian oscillatory transcripts in wild-type mice.

| Probe ID | Symbol        | FDR    | Acrophase [CT] | Expression levels (A-values) |       |       |       |       |       |
|----------|---------------|--------|----------------|------------------------------|-------|-------|-------|-------|-------|
|          |               |        |                | CT 0                         | CT 4  | CT 8  | CT 12 | CT 16 | CT 20 |
| 10345675 | Npas2         | 0.0001 | 23.68          | 8.08                         | 7.37  | 5.57  | 5.39  | 6.02  | 7.48  |
| 10494023 | Rorc          | 0.0001 | 17.11          | 8.26                         | 7.63  | 7.86  | 8.79  | 9.21  | 9.27  |
| 10390691 | Nr1d1         | 0.0001 | 6.90           | 8.38                         | 9.63  | 10.19 | 9.10  | 7.40  | 7.20  |
| 10356601 | Per2          | 0.0001 | 14.19          | 6.61                         | 6.53  | 7.35  | 8.27  | 8.24  | 7.48  |
| 10556463 | Arntl         | 0.0001 | 22.22          | 8.44                         | 7.47  | 5.58  | 5.64  | 7.32  | 8.28  |
| 10417734 | Nr1d2         | 0.0002 | 9.64           | 8.20                         | 9.25  | 9.87  | 9.95  | 9.06  | 7.99  |
| 10384378 | Ddc           | 0.0003 | 1.78           | 10.03                        | 10.01 | 9.56  | 8.90  | 9.01  | 9.55  |
| 10556266 | Wee1          | 0.0005 | 12.50          | 7.85                         | 8.05  | 8.70  | 9.16  | 8.81  | 8.23  |
| 10443332 | Ppard         | 0.0014 | 22.74          | 8.29                         | 7.83  | 7.13  | 7.08  | 7.55  | 8.18  |
| 10553092 | Dbp           | 0.0019 | 9.95           | 7.07                         | 8.54  | 10.83 | 10.55 | 8.28  | 7.50  |
| 10597960 | Slc6a20a      | 0.0019 | 10.16          | 7.68                         | 7.99  | 8.36  | 8.41  | 8.00  | 7.71  |
| 10558961 | Tspan4        | 0.0019 | 12.21          | 8.56                         | 8.66  | 9.32  | 9.58  | 9.24  | 8.81  |
| 10410530 | Slc6a19       | 0.0019 | 7.06           | 10.61                        | 11.07 | 11.31 | 10.95 | 10.27 | 10.29 |
| 10371400 | Cry1          | 0.0019 | 17.67          | 6.91                         | 5.77  | 5.91  | 7.02  | 7.58  | 7.49  |
| 10427095 | Tenc1         | 0.0026 | 8.87           | 8.48                         | 8.89  | 9.15  | 9.08  | 8.61  | 8.41  |
| 10349431 | Acmsd         | 0.0026 | 23.97          | 10.61                        | 10.48 | 10.02 | 9.63  | 9.98  | 10.50 |
| 10495035 | Slc16a1       | 0.0026 | 23.11          | 9.95                         | 9.58  | 8.45  | 8.11  | 9.08  | 9.73  |
| 10518781 | Per3          | 0.0026 | 11.64          | 5.96                         | 6.37  | 7.29  | 7.57  | 6.96  | 6.40  |
| 10389581 | Ypel2         | 0.0026 | 21.42          | 7.75                         | 7.12  | 6.54  | 6.66  | 7.36  | 7.80  |
| 10366707 | Avpr1a        | 0.0026 | 23.07          | 8.87                         | 8.43  | 7.92  | 7.38  | 8.12  | 8.73  |
| 10596454 | Alas1         | 0.0026 | 13.93          | 10.58                        | 10.47 | 10.89 | 11.39 | 11.24 | 10.90 |
| 10576901 | Slc10a2       | 0.0026 | 22.08          | 9.76                         | 9.31  | 8.81  | 8.66  | 9.35  | 9.73  |
| 10373452 | Gm129         | 0.0027 | 10.20          | 5.03                         | 6.07  | 8.39  | 8.89  | 6.11  | 5.06  |
| 10409278 | Nfil3         | 0.0030 | 20.48          | 7.71                         | 6.81  | 6.15  | 6.52  | 7.61  | 7.86  |
| 10496077 | Agxt2l1       | 0.0040 | 9.22           | 6.60                         | 7.15  | 7.66  | 7.47  | 6.91  | 6.56  |
| 10483000 | Itgb6         | 0.0040 | 0.43           | 10.61                        | 10.46 | 10.13 | 9.57  | 9.92  | 10.39 |
| 10363773 | Rhobtb1       | 0.0047 | 21.19          | 9.33                         | 8.59  | 8.04  | 8.00  | 9.11  | 9.24  |
| 10466304 | Dtx4          | 0.0076 | 23.68          | 8.30                         | 8.10  | 7.69  | 7.19  | 7.75  | 8.13  |
| 10574087 | Herpud1       | 0.0076 | 13.17          | 11.18                        | 11.28 | 11.73 | 11.82 | 11.86 | 11.48 |
| 10606989 | Tsc22d3       | 0.0078 | 14.91          | 7.60                         | 7.29  | 7.61  | 8.65  | 8.40  | 8.14  |
| 10542112 | Clec2h        | 0.0081 | 6.97           | 8.97                         | 9.63  | 9.72  | 9.35  | 8.70  | 8.65  |
| 10593225 | Zbtb16        | 0.0112 | 13.34          | 6.84                         | 6.70  | 7.28  | 8.29  | 7.87  | 7.14  |
| 10584634 | Usp2          | 0.0112 | 12.30          | 9.22                         | 9.40  | 9.99  | 10.19 | 9.91  | 9.57  |
| 10409162 | Susd3         | 0.0116 | 13.16          | 6.98                         | 6.99  | 7.40  | 7.90  | 7.62  | 7.28  |
| 10529671 | Slc2a9        | 0.0117 | 9.76           | 7.60                         | 8.03  | 8.33  | 8.28  | 7.95  | 7.65  |
| 10538658 | Herc3         | 0.0117 | 7.53           | 8.62                         | 9.25  | 9.35  | 9.20  | 8.41  | 8.31  |
| 10539933 | Txnrd3        | 0.0117 | 5.72           | 7.65                         | 7.97  | 7.90  | 7.64  | 7.37  | 7.41  |
| 10479047 | Pck1          | 0.0121 | 15.12          | 12.10                        | 11.99 | 12.23 | 12.54 | 12.70 | 12.39 |
| 10472923 | Ak3l1         | 0.0121 | 14.17          | 10.51                        | 10.44 | 10.83 | 11.22 | 11.15 | 10.88 |
| 10586368 | Clpx          | 0.0121 | 0.34           | 10.43                        | 10.29 | 9.90  | 9.79  | 9.84  | 10.27 |
| 10363224 | Fabp7         | 0.0121 | 1.41           | 7.35                         | 7.17  | 6.51  | 5.83  | 5.97  | 6.69  |
| 10471586 | Hspa5         | 0.0121 | 18.85          | 11.64                        | 11.36 | 11.08 | 11.36 | 12.21 | 12.11 |
| 10394735 | Pdia6         | 0.0121 | 20.97          | 10.88                        | 10.57 | 10.40 | 10.29 | 10.82 | 11.03 |
| 10425601 | Tef           | 0.0123 | 11.18          | 8.69                         | 9.09  | 9.67  | 9.95  | 9.38  | 8.94  |
| 10498978 | Lrat          | 0.0123 | 2.27           | 5.89                         | 6.03  | 5.54  | 5.28  | 5.18  | 5.61  |
| 10587639 | Nt5e          | 0.0133 | 21.07          | 10.06                        | 9.69  | 9.20  | 9.28  | 10.00 | 10.09 |
| 10404250 | Dcdc2a        | 0.0133 | 0.71           | 6.99                         | 7.01  | 6.35  | 6.04  | 6.35  | 6.73  |
| 10487879 | Rnf24         | 0.0134 | 10.72          | 7.86                         | 8.31  | 8.99  | 9.27  | 8.47  | 8.06  |
| 10502240 | Npnt          | 0.0149 | 23.03          | 9.88                         | 9.67  | 9.13  | 8.90  | 9.49  | 9.73  |
| 10504582 | 1300002K09Rik | 0.0149 | 1.83           | 7.56                         | 7.63  | 7.36  | 7.04  | 7.05  | 7.42  |
| 10472199 | Upp2          | 0.0150 | 10.15          | 7.21                         | 7.53  | 8.12  | 8.65  | 7.53  | 6.97  |
| 10381006 | Thra          | 0.0157 | 3.03           | 8.58                         | 8.74  | 8.45  | 8.05  | 7.99  | 8.25  |
| 10578207 | Lonrf1        | 0.0157 | 12.26          | 6.65                         | 6.64  | 7.25  | 7.61  | 7.29  | 6.73  |
| 10545874 | Cml5          | 0.0158 | 14.69          | 8.20                         | 7.89  | 8.43  | 10.12 | 9.78  | 9.21  |
| 10539295 | Dqx1          | 0.0170 | 6.90           | 6.22                         | 6.45  | 6.58  | 6.37  | 5.99  | 5.95  |
| 10476314 | Prnp          | 0.0170 | 13.53          | 9.86                         | 9.86  | 10.17 | 10.55 | 10.49 | 10.09 |
| 10469867 | Pnpla7        | 0.0183 | 8.91           | 7.67                         | 7.84  | 8.16  | 8.10  | 7.67  | 7.49  |
| 10485170 | Cry2          | 0.0185 | 13.49          | 6.98                         | 7.16  | 7.78  | 8.04  | 7.85  | 7.70  |
| 10414269 | Bnip3         | 0.0189 | 11.77          | 10.12                        | 10.28 | 10.50 | 10.67 | 10.50 | 10.24 |
| 10584712 | Hyou1         | 0.0189 | 19.30          | 9.63                         | 9.38  | 9.12  | 9.21  | 10.16 | 10.18 |
| 10350806 | Nphs2         | 0.0200 | 2.15           | 9.58                         | 9.55  | 9.38  | 8.87  | 8.90  | 9.24  |
| 10506269 | Ak3l1         | 0.0202 | 13.99          | 9.47                         | 9.48  | 9.84  | 10.28 | 10.18 | 9.90  |
| 10416689 | Olfm4         | 0.0212 | 9.60           | 7.67                         | 7.99  | 8.22  | 8.38  | 7.81  | 7.69  |
| 10530733 | Clock         | 0.0213 | 21.99          | 9.13                         | 8.86  | 8.49  | 8.55  | 8.90  | 9.03  |
| 10550956 | Ethe1         | 0.0225 | 0.62           | 8.81                         | 8.68  | 8.26  | 7.80  | 8.08  | 8.55  |
| 10346298 | Coq10b        | 0.0229 | 11.92          | 8.81                         | 8.83  | 9.41  | 9.76  | 9.38  | 8.83  |
| 10517744 | Arhgef10l     | 0.0233 | 23.56          | 8.91                         | 8.77  | 8.46  | 8.27  | 8.47  | 8.88  |
| 10472820 | Itga6         | 0.0239 | 22.04          | 9.88                         | 9.67  | 8.84  | 8.86  | 9.65  | 9.93  |

|          |               |        |       |       |       |       |       |       |       |
|----------|---------------|--------|-------|-------|-------|-------|-------|-------|-------|
| 10556553 | Insc          | 0.0251 | 20.43 | 6.47  | 6.09  | 5.79  | 5.95  | 6.46  | 6.59  |
| 10438769 | Cldn1         | 0.0256 | 0.87  | 8.07  | 7.90  | 7.48  | 7.11  | 7.24  | 7.74  |
| 10349711 | Slc41a1       | 0.0259 | 6.71  | 7.53  | 7.70  | 7.80  | 7.63  | 7.30  | 7.30  |
| 10587211 | Leo1          | 0.0275 | 21.84 | 7.08  | 6.74  | 6.15  | 6.48  | 6.71  | 7.02  |
| 10438340 | Comt1         | 0.0276 | 23.94 | 11.34 | 11.27 | 11.07 | 10.77 | 10.99 | 11.31 |
| 10429140 | Ndrgr1        | 0.0276 | 22.81 | 13.00 | 12.92 | 12.42 | 12.27 | 12.79 | 12.96 |
| 10581036 | Tk2           | 0.0278 | 7.19  | 7.03  | 7.42  | 7.47  | 7.34  | 6.85  | 6.88  |
| 10371482 | Hsp90b1       | 0.0279 | 20.34 | 11.81 | 11.65 | 11.25 | 11.41 | 11.94 | 12.02 |
| 10549473 | Caprin2       | 0.0295 | 5.74  | 6.60  | 6.78  | 6.85  | 6.50  | 6.22  | 6.21  |
| 10377439 | Per1          | 0.0296 | 10.73 | 6.88  | 7.66  | 7.69  | 8.32  | 7.57  | 7.28  |
| 10558921 | Pnpla2        | 0.0301 | 8.44  | 8.45  | 8.77  | 8.90  | 8.79  | 8.55  | 8.32  |
| 10408251 | Slc17a4       | 0.0304 | 6.24  | 5.49  | 6.03  | 5.86  | 5.64  | 5.25  | 5.27  |
| 10445241 | Tnfrsf21      | 0.0304 | 12.13 | 10.50 | 10.59 | 10.81 | 11.19 | 10.92 | 10.58 |
| 10422009 | ---           | 0.0304 | 20.36 | 5.19  | 4.65  | 4.50  | 4.69  | 4.97  | 5.62  |
| 10454369 | Fhod3         | 0.0304 | 5.81  | 7.58  | 7.92  | 7.92  | 7.54  | 7.39  | 7.38  |
| 10481634 | Slc25a25      | 0.0306 | 15.48 | 9.19  | 9.18  | 9.22  | 9.62  | 10.02 | 9.51  |
| 10366712 | Ppm1h         | 0.0339 | 23.21 | 8.72  | 8.64  | 8.10  | 7.93  | 8.41  | 8.62  |
| 10500272 | Gm129         | 0.0339 | 10.93 | 4.77  | 5.28  | 7.80  | 8.06  | 5.78  | 5.53  |
| 10503502 | Ttpa          | 0.0340 | 10.05 | 5.54  | 5.97  | 6.29  | 6.53  | 5.96  | 5.45  |
| 10382271 | Arsg          | 0.0341 | 4.40  | 8.61  | 8.78  | 8.78  | 8.30  | 7.81  | 8.25  |
| 10596575 | Manf          | 0.0341 | 18.37 | 8.41  | 8.20  | 7.91  | 8.24  | 9.17  | 8.90  |
| 10374453 | Glul          | 0.0341 | 15.00 | 11.64 | 11.53 | 11.69 | 11.95 | 12.05 | 11.78 |
| 10350800 | Tor1aip2      | 0.0341 | 6.95  | 8.27  | 8.63  | 8.66  | 8.48  | 8.12  | 8.11  |
| 10603125 | Asb9          | 0.0341 | 3.77  | 8.35  | 8.31  | 8.29  | 7.91  | 7.52  | 7.89  |
| 10381445 | Tmem106a      | 0.0341 | 8.51  | 9.00  | 9.33  | 9.41  | 9.42  | 9.05  | 8.91  |
| 10482846 | Ccdc148       | 0.0341 | 8.39  | 5.62  | 6.12  | 6.10  | 6.29  | 5.62  | 5.41  |
| 10460157 | Cpt1a         | 0.0341 | 8.39  | 10.98 | 11.17 | 11.40 | 11.31 | 10.94 | 10.85 |
| 10537410 | Tbxas1        | 0.0351 | 3.52  | 7.12  | 7.31  | 7.13  | 6.78  | 6.67  | 6.92  |
| 10441038 | Hlcs          | 0.0372 | 6.38  | 6.20  | 6.50  | 6.49  | 6.29  | 6.05  | 6.06  |
| 10405576 | Fbxl21        | 0.0379 | 6.81  | 6.11  | 6.35  | 6.58  | 6.28  | 5.73  | 5.76  |
| 10435733 | Igsf11        | 0.0389 | 1.16  | 9.69  | 9.70  | 9.47  | 9.11  | 9.33  | 9.52  |
| 10386473 | Srebf1        | 0.0427 | 18.96 | 8.33  | 8.15  | 7.98  | 8.16  | 8.65  | 8.67  |
| 10406941 | Sgtb          | 0.0429 | 7.11  | 5.69  | 6.23  | 6.25  | 6.00  | 5.56  | 5.42  |
| 10438098 | Sdf2l1        | 0.0461 | 19.32 | 7.85  | 7.47  | 7.33  | 7.28  | 8.45  | 8.46  |
| 10519488 | Tubb2c        | 0.0461 | 19.90 | 10.37 | 10.17 | 10.04 | 10.14 | 10.43 | 10.57 |
| 10545865 | Cml3          | 0.0482 | 13.74 | 10.19 | 10.01 | 10.57 | 11.43 | 11.08 | 10.58 |
| 10426098 | Creld2        | 0.0485 | 18.21 | 8.30  | 8.09  | 7.95  | 8.13  | 9.22  | 8.92  |
| 10438639 | Dgkg          | 0.0490 | 4.20  | 7.02  | 7.60  | 7.16  | 6.75  | 6.22  | 6.83  |
| 10444459 | Tnxb          | 0.0490 | 12.16 | 6.69  | 6.88  | 7.05  | 7.28  | 7.11  | 6.88  |
| 10421309 | Slc39a14      | 0.0492 | 10.56 | 7.84  | 7.97  | 8.21  | 8.40  | 8.04  | 7.80  |
| 10395259 | Nampt         | 0.0492 | 13.10 | 9.73  | 9.73  | 9.98  | 10.32 | 10.19 | 9.86  |
| 10515220 | Faah          | 0.0508 | 2.12  | 8.73  | 8.73  | 8.64  | 8.28  | 8.33  | 8.54  |
| 10480628 | Tubb2c        | 0.0508 | 19.84 | 10.38 | 10.21 | 10.07 | 10.16 | 10.47 | 10.58 |
| 10548194 | Fkbp4         | 0.0509 | 20.66 | 10.11 | 9.95  | 9.65  | 9.75  | 10.15 | 10.18 |
| 10549222 | Bcat1         | 0.0512 | 6.82  | 8.92  | 9.06  | 9.34  | 9.08  | 8.43  | 8.43  |
| 10484207 | 2610301F02Rik | 0.0512 | 21.39 | 8.33  | 7.95  | 7.54  | 7.50  | 8.18  | 8.35  |
| 10545862 | Cml3          | 0.0512 | 13.78 | 10.29 | 10.05 | 10.66 | 11.55 | 11.20 | 10.65 |
| 10417759 | Ube2e2        | 0.0512 | 6.25  | 7.77  | 8.11  | 8.06  | 7.90  | 7.54  | 7.65  |
| 10601312 | Gm10454       | 0.0512 | 23.92 | 8.34  | 8.10  | 7.76  | 7.62  | 7.84  | 8.06  |
| 10364287 | Sumo3         | 0.0512 | 1.55  | 8.84  | 8.89  | 8.61  | 8.43  | 8.42  | 8.74  |
| 10546056 | Rab43         | 0.0520 | 10.07 | 6.90  | 7.18  | 7.41  | 7.41  | 7.14  | 7.00  |
| 10444578 | Neu1          | 0.0523 | 6.09  | 10.13 | 10.33 | 10.38 | 10.18 | 9.87  | 9.98  |
| 10486833 | Eil3          | 0.0538 | 7.13  | 6.49  | 6.70  | 6.86  | 6.87  | 5.92  | 6.01  |
| 10406176 | Slc9a3        | 0.0538 | 7.52  | 10.03 | 10.24 | 10.39 | 10.15 | 10.01 | 9.80  |
| 10369379 | Slc29a3       | 0.0543 | 3.92  | 9.32  | 9.40  | 9.24  | 9.06  | 8.85  | 9.02  |
| 10479979 | Slc25a36      | 0.0549 | 6.93  | 9.87  | 10.28 | 10.33 | 10.04 | 9.80  | 9.73  |
| 10468762 | 4930506M07Rik | 0.0550 | 3.24  | 7.31  | 7.54  | 7.06  | 7.01  | 6.75  | 7.08  |
| 10438530 | Clcn2         | 0.0550 | 10.92 | 7.29  | 7.48  | 7.74  | 7.83  | 7.55  | 7.42  |
| 10545869 | Cml3          | 0.0551 | 13.70 | 10.21 | 9.96  | 10.59 | 11.47 | 11.12 | 10.54 |
| 10444895 | Flot1         | 0.0553 | 8.14  | 7.20  | 7.41  | 7.68  | 7.52  | 7.13  | 7.06  |
| 10480090 | Itga8         | 0.0558 | 5.53  | 8.01  | 8.15  | 8.10  | 7.83  | 7.37  | 7.34  |
| 10402195 | Tc2n          | 0.0558 | 9.27  | 6.24  | 6.98  | 7.28  | 7.60  | 6.46  | 6.22  |
| 10517036 | Wdtdc1        | 0.0560 | 2.81  | 8.62  | 8.71  | 8.50  | 8.36  | 8.31  | 8.46  |
| 10360684 | Ephx1         | 0.0565 | 10.22 | 9.16  | 9.38  | 9.61  | 9.78  | 9.44  | 9.04  |
| 10422013 | Klf12         | 0.0572 | 7.89  | 7.65  | 7.80  | 7.96  | 7.93  | 7.48  | 7.39  |
| 10580219 | Calr          | 0.0577 | 21.73 | 11.56 | 11.40 | 11.08 | 11.09 | 11.48 | 11.54 |
| 10556487 | A630005I04Rik | 0.0592 | 21.46 | 6.44  | 5.46  | 4.97  | 5.37  | 5.67  | 6.26  |
| 10521759 | Slit2         | 0.0592 | 8.67  | 8.30  | 8.46  | 8.68  | 8.65  | 8.28  | 8.10  |
| 10534281 | Clip2         | 0.0592 | 2.05  | 7.70  | 7.78  | 7.52  | 7.27  | 7.39  | 7.49  |
| 10362201 | Ctgf          | 0.0597 | 12.81 | 9.75  | 9.78  | 10.03 | 10.28 | 10.12 | 9.90  |
| 10373740 | Pik3ip1       | 0.0648 | 10.92 | 6.50  | 6.69  | 7.02  | 6.95  | 6.78  | 6.66  |
| 10542200 | Gabarapl1     | 0.0649 | 6.15  | 11.32 | 11.53 | 11.52 | 11.33 | 11.11 | 11.08 |

|          |               |        |       |       |       |       |       |       |       |
|----------|---------------|--------|-------|-------|-------|-------|-------|-------|-------|
| 10425987 | Ppara         | 0.0655 | 9.56  | 8.93  | 9.14  | 9.32  | 9.37  | 9.04  | 8.94  |
| 10556701 | Acsm5         | 0.0655 | 8.57  | 9.13  | 9.41  | 9.72  | 9.65  | 9.09  | 8.96  |
| 10523758 | Lrrc8b        | 0.0655 | 7.26  | 8.24  | 8.49  | 8.48  | 8.41  | 8.16  | 8.03  |
| 10449741 | Sik1          | 0.0655 | 13.68 | 9.21  | 9.24  | 9.42  | 9.74  | 9.60  | 9.47  |
| 10521626 | Cc2d2a        | 0.0673 | 4.87  | 7.33  | 7.58  | 7.39  | 7.25  | 6.95  | 7.13  |
| 10593384 | Dixdc1        | 0.0673 | 5.46  | 6.70  | 6.88  | 6.79  | 6.67  | 6.39  | 6.47  |
| 10464754 | Rhod          | 0.0673 | 3.88  | 7.87  | 8.07  | 7.94  | 7.58  | 7.61  | 7.66  |
| 10483157 | ---           | 0.0675 | 20.21 | 4.79  | 4.39  | 4.39  | 4.30  | 4.81  | 4.92  |
| 10510516 | Slc2a5        | 0.0676 | 9.63  | 9.20  | 9.34  | 9.73  | 9.66  | 9.26  | 9.22  |
| 10364237 | Gm10787       | 0.0690 | 15.29 | 6.34  | 6.20  | 6.61  | 7.04  | 6.96  | 6.99  |
| 10559790 | Zim1          | 0.0690 | 2.12  | 5.44  | 5.29  | 5.06  | 4.79  | 4.66  | 5.01  |
| 10439976 | 2310061J03Rik | 0.0692 | 7.74  | 5.92  | 6.15  | 6.37  | 6.26  | 5.73  | 5.77  |
| 10539342 | Rtkn          | 0.0704 | 14.97 | 6.65  | 6.63  | 6.83  | 7.15  | 7.14  | 7.05  |
| 10361250 | Camk1g        | 0.0730 | 0.07  | 6.42  | 6.39  | 5.78  | 5.75  | 5.99  | 6.23  |
| 10527475 | Zfp655        | 0.0732 | 9.06  | 7.76  | 8.04  | 8.20  | 8.22  | 7.86  | 7.72  |
| 10501302 | Sypl2         | 0.0732 | 15.02 | 8.08  | 7.93  | 8.08  | 8.48  | 8.39  | 8.28  |
| 10344952 | Rdh10         | 0.0732 | 22.88 | 10.57 | 10.47 | 10.13 | 9.82  | 10.36 | 10.57 |
| 10485282 | Alkbh3        | 0.0732 | 8.36  | 8.68  | 8.85  | 8.98  | 8.93  | 8.67  | 8.57  |
| 10362073 | Sgk1          | 0.0732 | 17.49 | 8.71  | 8.29  | 8.21  | 8.77  | 9.13  | 8.90  |
| 10553324 | Tmem86a       | 0.0736 | 5.90  | 8.20  | 8.73  | 8.84  | 8.38  | 7.69  | 8.18  |
| 10379044 | Rab34         | 0.0738 | 9.46  | 8.30  | 8.49  | 8.70  | 8.71  | 8.39  | 8.28  |
| 10378848 | Hsp90aa1      | 0.0738 | 20.03 | 12.13 | 11.96 | 11.65 | 11.79 | 12.29 | 12.27 |
| 10440238 | Nsun3         | 0.0738 | 7.46  | 7.85  | 8.18  | 8.22  | 8.16  | 7.71  | 7.67  |
| 10468802 | D19Ertid737e  | 0.0742 | 7.15  | 7.16  | 7.48  | 7.39  | 7.37  | 7.06  | 6.97  |
| 10362314 | Ptprk         | 0.0756 | 0.99  | 10.00 | 10.01 | 9.81  | 9.49  | 9.70  | 9.87  |
| 10421293 | Ppp3cc        | 0.0757 | 8.85  | 7.62  | 7.83  | 8.02  | 8.03  | 7.64  | 7.54  |
| 10484201 | 2610301F02Rik | 0.0757 | 21.27 | 9.03  | 8.67  | 8.20  | 8.18  | 8.98  | 9.01  |
| 10549276 | Bhlhe41       | 0.0757 | 10.40 | 5.00  | 5.24  | 6.39  | 6.29  | 5.35  | 5.16  |
| 10568785 | Bnip3         | 0.0757 | 11.91 | 9.21  | 9.39  | 9.69  | 9.79  | 9.56  | 9.48  |
| 10431147 | Ldoc1l        | 0.0757 | 23.14 | 7.18  | 7.02  | 6.81  | 6.51  | 6.69  | 7.36  |
| 10399478 | Lpin1         | 0.0757 | 10.60 | 9.10  | 9.45  | 9.67  | 9.96  | 9.39  | 9.33  |
| 10539632 | Alms1         | 0.0757 | 10.65 | 5.00  | 5.14  | 5.45  | 5.83  | 5.21  | 4.96  |
| 10544906 | Ggct          | 0.0757 | 3.17  | 7.54  | 7.54  | 7.43  | 7.20  | 7.04  | 7.26  |
| 10489620 | Ncoa5         | 0.0757 | 20.89 | 8.08  | 7.89  | 7.62  | 7.77  | 8.02  | 8.11  |
| 10441270 | Ripk4         | 0.0757 | 11.58 | 7.33  | 7.66  | 7.72  | 7.90  | 7.83  | 7.49  |
| 10399874 | Bcap29        | 0.0763 | 7.70  | 8.14  | 8.36  | 8.44  | 8.35  | 8.08  | 7.99  |
| 10485117 | Creb3l1       | 0.0765 | 0.19  | 6.79  | 6.74  | 6.40  | 6.22  | 6.47  | 6.64  |
| 10356406 | Ngef          | 0.0765 | 11.97 | 8.14  | 8.29  | 8.42  | 8.59  | 8.47  | 8.26  |
| 10463211 | Pi4k2a        | 0.0765 | 22.50 | 9.06  | 9.00  | 8.66  | 8.53  | 8.91  | 9.12  |
| 10348451 | Cxcr7         | 0.0765 | 20.96 | 7.60  | 7.26  | 6.73  | 7.16  | 7.37  | 7.69  |
| 10484197 | 2610301F02Rik | 0.0774 | 21.52 | 8.09  | 7.83  | 7.14  | 7.24  | 8.00  | 8.09  |
| 10354563 | Dnahc7b       | 0.0775 | 6.68  | 6.12  | 6.60  | 6.34  | 6.29  | 6.06  | 5.90  |
| 10378453 | 1300001I01Rik | 0.0775 | 0.55  | 10.75 | 10.68 | 10.51 | 10.26 | 10.42 | 10.62 |
| 10539640 | Alms1         | 0.0775 | 10.74 | 4.90  | 5.05  | 5.31  | 5.74  | 5.14  | 4.86  |
| 10358454 | Rbm3          | 0.0775 | 10.30 | 10.20 | 10.67 | 10.92 | 10.94 | 10.62 | 10.44 |
| 10499483 | Fdps          | 0.0775 | 22.25 | 8.06  | 7.98  | 7.71  | 7.55  | 7.94  | 8.16  |
| 10454235 | Asxl3         | 0.0775 | 23.12 | 6.55  | 6.42  | 6.23  | 6.17  | 6.24  | 6.58  |
| 10557843 | Fus           | 0.0784 | 6.48  | 9.02  | 9.45  | 9.20  | 9.30  | 8.56  | 8.65  |
| 10373902 | Gatsl3        | 0.0784 | 9.11  | 7.13  | 7.51  | 7.77  | 7.94  | 7.16  | 7.08  |
| 10491780 | Hspa4l        | 0.0784 | 19.80 | 8.74  | 8.59  | 8.34  | 8.48  | 8.91  | 8.94  |
| 10525893 | Aacs          | 0.0790 | 15.13 | 9.85  | 9.65  | 10.20 | 10.54 | 10.44 | 10.46 |
| 10510270 | Mthfr         | 0.0790 | 22.68 | 7.85  | 7.68  | 7.18  | 7.42  | 7.50  | 7.77  |
| 10505187 | Ugcg          | 0.0798 | 7.77  | 7.10  | 7.53  | 7.51  | 7.42  | 7.14  | 7.07  |
| 10402615 | Hsp90aa1      | 0.0802 | 19.92 | 11.75 | 11.61 | 11.30 | 11.44 | 11.95 | 11.91 |
| 10419779 | Haus4         | 0.0804 | 6.32  | 6.70  | 6.86  | 7.08  | 6.75  | 6.43  | 6.56  |
| 10408928 | Hspb1         | 0.0810 | 18.41 | 7.81  | 7.58  | 7.68  | 7.67  | 8.11  | 8.05  |
| 10394942 | Taf1b         | 0.0810 | 6.07  | 7.02  | 7.32  | 7.31  | 7.10  | 6.74  | 6.86  |
| 10574350 | Mmp15         | 0.0810 | 22.86 | 6.53  | 6.36  | 6.06  | 6.07  | 6.18  | 6.54  |
| 10417579 | 4930452B06Rik | 0.0810 | 7.61  | 5.16  | 5.31  | 5.51  | 5.37  | 5.01  | 5.00  |
| 10558150 | Htra1         | 0.0810 | 1.58  | 9.75  | 9.87  | 9.55  | 9.36  | 9.50  | 9.63  |
| 10455259 | Arhgap26      | 0.0810 | 1.81  | 8.33  | 8.38  | 7.99  | 7.83  | 7.86  | 8.09  |
| 10518532 | Tardbp        | 0.0810 | 18.70 | 9.23  | 9.06  | 8.81  | 9.19  | 9.41  | 9.45  |
| 10452815 | Xdh           | 0.0810 | 10.93 | 7.74  | 7.92  | 8.08  | 8.19  | 7.99  | 7.82  |
| 10603208 | Mid1          | 0.0810 | 0.90  | 7.82  | 7.88  | 7.48  | 7.38  | 7.54  | 7.67  |
| 10433597 | Snx29         | 0.0810 | 23.66 | 10.36 | 10.19 | 9.92  | 9.84  | 10.00 | 10.21 |
| 10419240 | Ddhd1         | 0.0810 | 22.75 | 8.70  | 8.50  | 8.27  | 8.21  | 8.42  | 8.62  |
| 10498871 | Tmem144       | 0.0810 | 5.51  | 8.80  | 8.88  | 8.99  | 8.71  | 8.23  | 8.40  |
| 10359118 | Tdrd5         | 0.0810 | 0.56  | 6.26  | 6.09  | 6.13  | 5.75  | 5.84  | 6.17  |
| 10419854 | Slc7a8        | 0.0810 | 23.78 | 11.13 | 11.03 | 10.74 | 10.61 | 10.78 | 11.05 |
| 10526410 | Hspb1         | 0.0810 | 18.41 | 7.78  | 7.47  | 7.55  | 7.61  | 8.08  | 7.98  |
| 10517312 | Tmem57        | 0.0821 | 12.94 | 8.21  | 8.14  | 8.38  | 8.61  | 8.43  | 8.28  |
| 10401488 | Abcd4         | 0.0821 | 7.12  | 8.02  | 8.16  | 8.31  | 8.19  | 7.79  | 7.83  |

|          |               |        |       |       |       |       |       |       |       |
|----------|---------------|--------|-------|-------|-------|-------|-------|-------|-------|
| 10480035 | Pfkfb3        | 0.0841 | 9.78  | 7.27  | 7.64  | 7.65  | 7.90  | 7.51  | 7.27  |
| 10377560 | Sat2          | 0.0846 | 7.35  | 7.98  | 8.18  | 8.35  | 8.19  | 7.83  | 7.88  |
| 10603469 | Rbm3          | 0.0849 | 10.31 | 9.97  | 10.41 | 10.66 | 10.69 | 10.37 | 10.19 |
| 10390103 | Pdk2          | 0.0849 | 7.90  | 10.47 | 10.69 | 10.81 | 10.69 | 10.46 | 10.39 |
| 10535904 | Hsph1         | 0.0849 | 17.60 | 10.31 | 9.95  | 9.81  | 10.26 | 10.83 | 10.40 |
| 10607585 | Gm15190       | 0.0849 | 19.67 | 6.19  | 6.01  | 5.84  | 6.01  | 6.25  | 6.35  |
| 10428012 | Ropn1l        | 0.0859 | 8.79  | 6.09  | 6.31  | 6.41  | 6.47  | 6.10  | 6.05  |
| 10479902 | Dhtkd1        | 0.0859 | 9.45  | 8.26  | 8.52  | 8.63  | 8.82  | 8.37  | 8.18  |
| 10358177 | 5730559C18Rik | 0.0859 | 19.70 | 7.18  | 7.06  | 6.75  | 7.02  | 7.29  | 7.36  |
| 10409240 | Sema4d        | 0.0859 | 6.45  | 8.55  | 8.80  | 8.73  | 8.58  | 8.49  | 8.35  |
| 10401935 | BC005685      | 0.0874 | 12.85 | 3.92  | 3.99  | 4.33  | 4.40  | 4.30  | 4.17  |
| 10497682 | Kcnmb3        | 0.0874 | 19.18 | 6.34  | 6.16  | 6.04  | 6.20  | 6.48  | 6.52  |
| 10395039 | Cmpk2         | 0.0874 | 20.89 | 7.16  | 6.93  | 6.78  | 6.70  | 7.15  | 7.29  |
| 10565456 | Prss23        | 0.0874 | 0.91  | 7.55  | 7.61  | 7.33  | 7.02  | 7.27  | 7.44  |
| 10504757 | BC005685      | 0.0880 | 11.88 | 4.25  | 4.28  | 4.68  | 4.73  | 4.49  | 4.40  |
| 10425999 | Ttc38         | 0.0893 | 9.32  | 8.75  | 8.98  | 9.08  | 9.14  | 8.89  | 8.66  |
| 10405693 | Dapk1         | 0.0908 | 23.16 | 9.58  | 9.51  | 9.28  | 9.11  | 9.42  | 9.53  |
| 10492522 | Schip1        | 0.0908 | 21.49 | 8.01  | 7.72  | 7.61  | 7.64  | 7.79  | 8.01  |
| 10370665 | Med16         | 0.0908 | 7.05  | 8.00  | 8.28  | 8.27  | 8.11  | 7.99  | 7.90  |
| 10491915 | Ccrn4l        | 0.0908 | 14.44 | 7.44  | 7.51  | 7.58  | 7.88  | 8.05  | 7.67  |
| 10417869 | Anxa7         | 0.0908 | 10.60 | 8.03  | 8.24  | 8.47  | 8.47  | 8.26  | 8.18  |
| 10485013 | 1110051M20Rik | 0.0926 | 7.99  | 7.68  | 7.86  | 7.95  | 7.91  | 7.63  | 7.57  |
| 10569545 | Nadsyn1       | 0.0926 | 10.09 | 7.60  | 7.77  | 7.93  | 8.03  | 7.74  | 7.61  |
| 10411456 | Tmem174       | 0.0931 | 7.75  | 11.08 | 11.28 | 11.52 | 11.37 | 10.93 | 11.02 |
| 10428857 | Mtss1         | 0.0934 | 9.96  | 8.76  | 8.83  | 9.21  | 9.19  | 8.82  | 8.74  |
| 10467768 | Loxl4         | 0.0934 | 0.32  | 6.65  | 6.58  | 6.08  | 6.11  | 6.17  | 6.47  |
| 10571364 | 1700016D18Rik | 0.0934 | 7.66  | 3.32  | 3.51  | 3.77  | 3.53  | 3.23  | 3.15  |
| 10593526 | Atm           | 0.0934 | 6.08  | 7.59  | 7.71  | 7.71  | 7.62  | 7.21  | 7.28  |
| 10508707 | Tmem200b      | 0.0934 | 14.91 | 7.19  | 7.09  | 7.30  | 7.52  | 7.54  | 7.39  |
| 10500555 | Hsd3b3        | 0.0944 | 14.01 | 9.00  | 8.93  | 9.00  | 9.58  | 9.38  | 9.16  |
| 10570280 | F7            | 0.0944 | 15.60 | 5.15  | 5.01  | 5.10  | 5.36  | 5.40  | 5.26  |
| 10496373 | Ddit4l        | 0.0952 | 23.46 | 7.85  | 7.42  | 7.18  | 7.00  | 7.36  | 7.39  |
| 10453057 | Cyp1b1        | 0.0953 | 4.91  | 8.33  | 8.69  | 8.64  | 8.09  | 8.08  | 8.07  |
| 10406598 | Serinc5       | 0.0953 | 5.18  | 8.13  | 8.28  | 8.32  | 8.01  | 7.74  | 7.88  |
| 10403312 | Akr1c19       | 0.0958 | 14.07 | 7.81  | 7.82  | 7.92  | 8.48  | 8.35  | 8.09  |
| 10385540 | Olfrl396      | 0.0959 | 22.48 | 6.19  | 5.91  | 5.69  | 5.76  | 5.87  | 6.05  |
| 10500362 | Polr3gl       | 0.0960 | 10.27 | 8.16  | 8.33  | 8.45  | 8.54  | 8.32  | 8.18  |
| 10532150 | Fam69a        | 0.0967 | 4.96  | 8.76  | 8.89  | 8.94  | 8.64  | 8.38  | 8.57  |
| 10599192 | Lonrf3        | 0.0967 | 19.19 | 7.47  | 6.48  | 6.73  | 6.92  | 7.44  | 7.50  |
| 10587829 | Plod2         | 0.0967 | 0.24  | 8.94  | 9.05  | 8.35  | 8.26  | 8.54  | 8.85  |
| 10389786 | Hlf           | 0.0967 | 14.03 | 8.70  | 8.79  | 9.04  | 9.28  | 9.21  | 9.12  |
| 10544837 | 1200009O22Rik | 0.0967 | 23.72 | 7.30  | 7.13  | 7.07  | 6.71  | 6.92  | 7.26  |
| 10399680 | Cys1          | 0.0967 | 13.15 | 7.05  | 7.10  | 7.11  | 7.48  | 7.40  | 7.10  |
| 10400748 | Cdk1l         | 0.0968 | 0.01  | 10.63 | 10.42 | 10.20 | 10.12 | 10.16 | 10.47 |
| 10385872 | Slc22a5       | 0.0973 | 11.58 | 9.83  | 9.89  | 10.12 | 10.14 | 10.05 | 9.87  |
| 10499378 | Sema4a        | 0.0973 | 3.93  | 9.70  | 9.82  | 9.79  | 9.49  | 9.41  | 9.55  |
| 10451079 | 4930564C03Rik | 0.0973 | 15.46 | 5.13  | 4.96  | 5.19  | 5.42  | 5.48  | 5.34  |
| 10481435 | Ccbl1         | 0.0975 | 9.43  | 9.48  | 9.74  | 10.04 | 10.21 | 9.51  | 9.46  |
| 10513587 | Rnf183        | 0.0976 | 0.20  | 9.14  | 9.09  | 8.93  | 8.67  | 8.87  | 9.07  |
| 10526559 | Ache          | 0.0976 | 10.29 | 5.75  | 5.83  | 6.15  | 6.11  | 6.03  | 5.52  |
| 10596318 | Nudt16        | 0.0976 | 8.82  | 6.58  | 6.93  | 7.14  | 7.02  | 6.71  | 6.57  |
| 10468159 | Ldb1          | 0.0976 | 7.53  | 8.75  | 8.92  | 8.98  | 8.91  | 8.68  | 8.64  |
| 10545886 | 1700019G17Rik | 0.0976 | 5.83  | 6.74  | 6.91  | 6.95  | 6.69  | 6.41  | 6.43  |
| 10440091 | Col8a1        | 0.0976 | 0.57  | 6.99  | 7.03  | 6.70  | 6.51  | 6.73  | 6.89  |
| 10565727 | Tsku          | 0.0977 | 12.85 | 6.98  | 6.99  | 7.42  | 7.84  | 7.37  | 7.34  |
| 10385822 | Gm10447       | 0.0977 | 15.91 | 4.48  | 4.39  | 4.62  | 4.83  | 4.86  | 4.91  |
| 10481845 | Fam125b       | 0.0978 | 6.09  | 7.33  | 7.48  | 7.53  | 7.35  | 7.09  | 7.13  |
| 10365658 | Uhrf1bp1l     | 0.0979 | 9.03  | 8.87  | 9.04  | 9.12  | 9.18  | 8.92  | 8.75  |
| 10364712 | Cirbp         | 0.0979 | 6.99  | 8.37  | 8.94  | 9.41  | 8.81  | 8.01  | 8.41  |
| 10395394 | 4930579E17Rik | 0.0987 | 7.16  | 5.87  | 6.07  | 6.08  | 6.03  | 5.70  | 5.59  |
| 10422312 | Cldn10        | 0.0987 | 1.56  | 11.01 | 11.02 | 10.85 | 10.69 | 10.66 | 10.93 |
| 10565794 | Serpinh1      | 0.0989 | 19.63 | 7.70  | 7.36  | 7.29  | 7.41  | 7.75  | 7.78  |
| 10544525 | Pdia4         | 0.0989 | 19.26 | 10.24 | 10.14 | 9.94  | 10.00 | 10.59 | 10.50 |
| 10458285 | 5133400G04Rik | 0.0989 | 8.20  | 6.03  | 6.37  | 6.35  | 6.42  | 6.02  | 6.01  |
| 10420889 | 1110020C17Rik | 0.0998 | 16.93 | 4.02  | 3.81  | 4.05  | 4.08  | 4.45  | 4.27  |

**Supplementary Table 2.** Circadian oscillatory transcripts in *clock*-knockout mice.

| Probe ID | Symbol        | FDR    | Acrophase [CT] | Expression levels (A-values) |       |       |       |       |       |
|----------|---------------|--------|----------------|------------------------------|-------|-------|-------|-------|-------|
|          |               |        |                | CT 0                         | CT 4  | CT 8  | CT 12 | CT 16 | CT 20 |
| 10345675 | Npas2         | 0.0024 | 19.81          | 7.87                         | 7.08  | 6.36  | 6.93  | 5.98  | 8.21  |
| 10443332 | Ppard         | 0.0026 | 19.26          | 7.83                         | 7.39  | 7.20  | 7.47  | 7.41  | 8.23  |
| 10463355 | Scd2          | 0.0040 | 17.90          | 9.98                         | 9.52  | 9.61  | 9.97  | 10.07 | 10.25 |
| 10602372 | Alas2         | 0.0047 | 4.25           | 7.11                         | 7.50  | 7.12  | 6.69  | 7.21  | 6.54  |
| 10476314 | Prnp          | 0.0079 | 9.40           | 9.60                         | 9.86  | 10.22 | 10.19 | 10.63 | 9.33  |
| 10545869 | Cml3          | 0.0123 | 9.88           | 9.29                         | 9.49  | 10.39 | 10.68 | 11.11 | 8.62  |
| 10496077 | Agxt2l1       | 0.0123 | 8.10           | 6.88                         | 7.22  | 7.61  | 7.37  | 6.92  | 6.54  |
| 10506269 | Ak3l1         | 0.0154 | 10.84          | 9.43                         | 9.64  | 9.87  | 9.95  | 10.24 | 9.46  |
| 10403303 | Akr1c13       | 0.0157 | 7.83           | 6.96                         | 7.18  | 7.54  | 7.27  | 6.58  | 6.64  |
| 10349431 | Acmsd         | 0.0160 | 21.59          | 10.61                        | 10.30 | 9.72  | 9.84  | 9.99  | 10.71 |
| 10364712 | Cirbp         | 0.0170 | 5.00           | 8.68                         | 9.07  | 8.89  | 8.53  | 8.24  | 8.42  |
| 10392522 | Abca8a        | 0.0170 | 11.69          | 7.55                         | 7.82  | 8.08  | 8.27  | 8.56  | 7.73  |
| 10545865 | Cml3          | 0.0170 | 9.84           | 9.35                         | 9.50  | 10.38 | 10.66 | 11.10 | 8.64  |
| 10366712 | Ppm1h         | 0.0171 | 20.37          | 8.74                         | 8.57  | 8.34  | 8.43  | 8.38  | 8.89  |
| 10545862 | Cml3          | 0.0182 | 9.86           | 9.43                         | 9.55  | 10.49 | 10.77 | 11.21 | 8.68  |
| 10450038 | Angptl4       | 0.0188 | 7.27           | 7.32                         | 7.82  | 7.88  | 7.62  | 7.85  | 6.92  |
| 10492306 | Sucnr1        | 0.0189 | 7.20           | 9.02                         | 9.19  | 9.42  | 9.14  | 9.15  | 8.51  |
| 10434675 | Dnajb11       | 0.0195 | 17.99          | 9.58                         | 9.37  | 9.32  | 9.59  | 9.97  | 9.84  |
| 10356601 | Per2          | 0.0202 | 12.30          | 6.68                         | 7.03  | 7.53  | 7.91  | 8.17  | 7.15  |
| 10549025 | Slco1a6       | 0.0207 | 8.54           | 10.07                        | 10.39 | 10.50 | 10.56 | 10.83 | 9.67  |
| 10459879 | Slc14a2       | 0.0213 | 20.01          | 7.80                         | 7.58  | 7.49  | 7.55  | 7.54  | 8.09  |
| 10375051 | Hba-a1        | 0.0213 | 3.96           | 12.23                        | 12.51 | 12.20 | 11.82 | 12.29 | 11.82 |
| 10375058 | Hba-a2        | 0.0220 | 3.98           | 12.13                        | 12.42 | 12.11 | 11.73 | 12.23 | 11.71 |
| 10378568 | ---           | 0.0239 | 8.79           | 6.79                         | 6.94  | 7.18  | 7.22  | 6.90  | 6.43  |
| 10435075 | Tfrc          | 0.0251 | 18.76          | 10.20                        | 9.79  | 9.68  | 10.01 | 10.31 | 10.25 |
| 10580219 | Calr          | 0.0251 | 19.18          | 11.41                        | 11.25 | 11.07 | 11.26 | 11.53 | 11.64 |
| 10467766 | Loxl4         | 0.0251 | 19.63          | 5.83                         | 5.29  | 5.20  | 5.16  | 5.19  | 6.68  |
| 10429856 | Spatc1        | 0.0253 | 7.72           | 6.39                         | 6.61  | 7.02  | 6.71  | 6.73  | 6.11  |
| 10408656 | Peci          | 0.0253 | 9.25           | 9.33                         | 9.55  | 9.75  | 9.74  | 9.72  | 9.20  |
| 10472820 | Itga6         | 0.0256 | 18.96          | 10.02                        | 9.68  | 9.55  | 9.80  | 9.69  | 10.37 |
| 10438098 | Sdf2l1        | 0.0275 | 18.15          | 7.70                         | 7.42  | 7.08  | 7.75  | 8.39  | 8.14  |
| 10526232 | Wbscr27       | 0.0276 | 5.43           | 7.43                         | 7.61  | 7.58  | 7.38  | 7.18  | 7.19  |
| 10479902 | Dhtkd1        | 0.0289 | 7.71           | 8.34                         | 8.64  | 8.94  | 8.65  | 8.42  | 7.96  |
| 10483000 | Itgb6         | 0.0304 | 21.67          | 10.65                        | 10.47 | 10.22 | 10.12 | 9.98  | 10.75 |
| 10545874 | Cml5          | 0.0304 | 10.13          | 5.62                         | 5.93  | 7.61  | 8.58  | 10.09 | 4.67  |
| 10519951 | Pion          | 0.0304 | 7.51           | 7.03                         | 7.40  | 7.42  | 7.43  | 7.34  | 6.80  |
| 10373374 | Slc39a5       | 0.0304 | 21.52          | 9.14                         | 8.96  | 8.61  | 8.71  | 8.77  | 9.27  |
| 10496813 | Ctbs          | 0.0305 | 7.24           | 8.48                         | 8.70  | 8.82  | 8.62  | 8.51  | 8.25  |
| 10353450 | Gm4956        | 0.0305 | 10.93          | 5.27                         | 5.49  | 6.06  | 6.26  | 6.59  | 5.30  |
| 10502240 | Npnt          | 0.0309 | 20.11          | 10.22                        | 9.96  | 9.64  | 9.85  | 9.41  | 10.46 |
| 10439299 | Stfa3         | 0.0323 | 18.98          | 3.38                         | 3.11  | 3.01  | 3.26  | 3.16  | 3.48  |
| 10593332 | Bco2          | 0.0323 | 6.45           | 7.57                         | 7.80  | 7.82  | 7.61  | 7.39  | 6.91  |
| 10606989 | Tsc22d3       | 0.0329 | 12.34          | 7.57                         | 7.56  | 8.17  | 8.38  | 8.35  | 7.75  |
| 10416689 | Olfm4         | 0.0340 | 7.39           | 7.78                         | 8.07  | 8.18  | 8.17  | 7.87  | 6.98  |
| 10394735 | Pdia6         | 0.0340 | 19.14          | 10.76                        | 10.55 | 10.41 | 10.58 | 10.87 | 11.01 |
| 10484201 | 2610301F02Rik | 0.0341 | 18.87          | 9.09                         | 8.88  | 8.80  | 8.95  | 8.99  | 9.47  |
| 10556463 | Arntl         | 0.0361 | 18.97          | 8.36                         | 7.76  | 7.45  | 8.05  | 7.28  | 8.63  |
| 10485241 | Accs          | 0.0380 | 6.59           | 6.37                         | 6.67  | 6.68  | 6.48  | 6.18  | 6.22  |
| 10544837 | 1200009O22Rik | 0.0384 | 21.37          | 7.57                         | 7.28  | 7.10  | 7.16  | 6.81  | 7.57  |
| 10574087 | Herpud1       | 0.0396 | 9.82           | 11.11                        | 11.35 | 11.59 | 11.64 | 11.90 | 10.97 |
| 10371482 | Hsp90b1       | 0.0404 | 18.41          | 11.69                        | 11.55 | 11.47 | 11.61 | 11.99 | 11.98 |
| 10417734 | Nr1d2         | 0.0429 | 6.97           | 8.35                         | 8.82  | 9.06  | 8.74  | 9.18  | 7.65  |
| 10424979 | Gpt           | 0.0448 | 8.30           | 6.50                         | 6.71  | 6.93  | 6.80  | 6.93  | 6.40  |
| 10545041 | Nap1l5        | 0.0452 | 6.07           | 7.49                         | 7.80  | 7.76  | 7.49  | 7.00  | 7.11  |
| 10462132 | Pgm5          | 0.0452 | 7.85           | 8.65                         | 8.97  | 9.33  | 9.04  | 8.85  | 8.09  |
| 10378816 | Slc6a4        | 0.0455 | 6.97           | 6.91                         | 7.27  | 7.24  | 7.04  | 7.19  | 6.54  |
| 10411622 | Birc1f        | 0.0492 | 13.22          | 3.44                         | 3.40  | 3.70  | 4.10  | 3.68  | 3.55  |
| 10383767 | Osbp2         | 0.0493 | 7.12           | 7.50                         | 7.77  | 7.77  | 7.72  | 7.56  | 6.97  |
| 10360563 | Smyd3         | 0.0495 | 6.24           | 7.75                         | 7.88  | 7.94  | 7.76  | 7.62  | 7.51  |
| 10381445 | Tmem106a      | 0.0502 | 6.35           | 9.15                         | 9.47  | 9.38  | 9.25  | 9.10  | 8.96  |
| 10426425 | Pdzrn4        | 0.0502 | 22.83          | 5.93                         | 5.72  | 5.54  | 5.45  | 5.51  | 5.80  |
| 10363773 | Rhobtb1       | 0.0506 | 18.62          | 9.25                         | 9.02  | 8.85  | 9.16  | 9.11  | 9.36  |
| 10602865 | Pdha1         | 0.0512 | 7.83           | 8.19                         | 8.38  | 8.41  | 8.38  | 8.36  | 7.99  |
| 10471586 | Hspa5         | 0.0512 | 15.61          | 11.42                        | 11.31 | 11.38 | 11.77 | 12.28 | 11.61 |
| 10420114 | Tgm1          | 0.0512 | 10.05          | 7.83                         | 8.09  | 8.22  | 8.51  | 8.65  | 7.61  |
| 10584712 | Hyou1         | 0.0512 | 16.57          | 9.40                         | 9.26  | 9.24  | 9.63  | 10.23 | 9.68  |
| 10597960 | Slc6a20a      | 0.0541 | 9.40           | 7.96                         | 8.12  | 8.47  | 8.36  | 8.02  | 7.95  |
| 10356484 | Gbx2          | 0.0549 | 23.25          | 6.16                         | 6.04  | 5.81  | 5.77  | 5.84  | 6.09  |



|          |               |        |       |       |       |       |       |       |       |
|----------|---------------|--------|-------|-------|-------|-------|-------|-------|-------|
| 10425601 | Tef           | 0.0549 | 8.95  | 8.67  | 8.92  | 9.29  | 9.29  | 9.40  | 8.42  |
| 10408838 | Elovl2        | 0.0549 | 19.76 | 8.75  | 8.37  | 8.18  | 8.31  | 8.29  | 9.12  |
| 10566258 | Hbb-b1        | 0.0551 | 3.65  | 12.68 | 12.91 | 12.61 | 12.29 | 12.71 | 12.38 |
| 10409666 | Kif27         | 0.0551 | 21.04 | 4.95  | 4.85  | 4.63  | 4.70  | 4.70  | 5.11  |
| 10514520 | Cyp2j9        | 0.0551 | 7.19  | 7.50  | 7.89  | 7.84  | 7.84  | 7.79  | 7.30  |
| 10556553 | Insc          | 0.0560 | 19.81 | 6.57  | 6.27  | 6.24  | 6.31  | 6.26  | 6.70  |
| 10395039 | Cmpk2         | 0.0560 | 18.12 | 7.23  | 7.06  | 7.00  | 7.19  | 7.16  | 7.41  |
| 10566254 | Hbb-b1        | 0.0560 | 3.67  | 12.69 | 12.91 | 12.62 | 12.31 | 12.73 | 12.38 |
| 10563314 | Dhdh          | 0.0561 | 8.77  | 6.83  | 7.12  | 7.27  | 7.22  | 7.32  | 6.78  |
| 10447341 | Rhoq          | 0.0592 | 8.21  | 7.33  | 7.60  | 7.68  | 7.63  | 7.43  | 7.17  |
| 10452815 | Xdh           | 0.0592 | 11.24 | 7.80  | 8.03  | 8.18  | 8.35  | 8.03  | 7.94  |
| 10375704 | 3010026O09Rik | 0.0597 | 2.55  | 8.29  | 8.38  | 8.14  | 7.98  | 7.70  | 8.11  |
| 10402195 | Tc2n          | 0.0608 | 9.25  | 5.39  | 6.27  | 6.45  | 6.60  | 6.96  | 5.09  |
| 10538658 | Herc3         | 0.0643 | 6.83  | 8.59  | 9.12  | 9.19  | 8.90  | 8.64  | 8.43  |
| 10530201 | Ugdh          | 0.0654 | 7.77  | 10.72 | 10.84 | 11.04 | 10.84 | 10.77 | 10.51 |
| 10597758 | Csrp1         | 0.0654 | 10.62 | 6.44  | 6.66  | 6.86  | 7.05  | 6.78  | 6.52  |
| 10500555 | Hsd3b3        | 0.0655 | 8.30  | 8.79  | 9.04  | 9.21  | 9.32  | 9.52  | 8.23  |
| 10347481 | Cyp27a1       | 0.0655 | 8.38  | 8.59  | 8.93  | 8.98  | 8.98  | 9.01  | 8.22  |
| 10351491 | Olfml2b       | 0.0655 | 23.10 | 6.24  | 5.97  | 5.76  | 5.74  | 5.58  | 6.05  |
| 10414970 | A730076H11Rik | 0.0655 | 22.59 | 5.74  | 5.40  | 5.30  | 5.07  | 4.75  | 5.68  |
| 10385893 | Slc22a4       | 0.0655 | 7.40  | 9.06  | 9.19  | 9.43  | 9.17  | 9.24  | 8.64  |
| 10426098 | Creld2        | 0.0656 | 14.27 | 8.02  | 8.09  | 8.16  | 8.72  | 9.26  | 8.23  |
| 10568709 | Clrn3         | 0.0656 | 20.15 | 9.84  | 9.62  | 9.57  | 9.57  | 9.63  | 9.98  |
| 10504203 | 4930578G10Rik | 0.0676 | 11.73 | 5.23  | 5.72  | 5.79  | 6.19  | 6.08  | 5.58  |
| 10435048 | Tctex1d2      | 0.0690 | 6.23  | 7.46  | 7.56  | 7.74  | 7.47  | 7.30  | 7.26  |
| 10436636 | Ncam2         | 0.0690 | 7.32  | 4.03  | 4.25  | 4.38  | 4.24  | 4.27  | 3.91  |
| 10596454 | Alas1         | 0.0690 | 12.76 | 10.36 | 10.39 | 10.62 | 11.14 | 11.34 | 10.43 |
| 10526853 | Fam20c        | 0.0706 | 18.79 | 8.96  | 8.81  | 8.74  | 8.89  | 9.04  | 9.09  |
| 10521391 | Acox3         | 0.0708 | 8.41  | 9.98  | 10.16 | 10.33 | 10.36 | 10.44 | 9.64  |
| 10587780 | Tuba1b        | 0.0732 | 19.24 | 11.25 | 10.98 | 10.95 | 11.09 | 11.18 | 11.44 |
| 10578690 | Neil3         | 0.0732 | 20.96 | 5.27  | 4.71  | 4.62  | 4.67  | 4.59  | 5.40  |
| 10423548 | Sdc2          | 0.0732 | 7.68  | 9.01  | 9.34  | 9.31  | 9.33  | 9.35  | 8.69  |
| 10556583 | Nucb2         | 0.0736 | 8.18  | 7.90  | 8.06  | 8.17  | 8.08  | 8.18  | 7.82  |
| 10549222 | Bcat1         | 0.0738 | 5.86  | 8.99  | 8.98  | 9.08  | 8.88  | 8.47  | 8.42  |
| 10386844 | Zswim7        | 0.0757 | 7.47  | 8.32  | 8.55  | 8.62  | 8.49  | 8.48  | 8.18  |
| 10549108 | Abcc9         | 0.0757 | 8.81  | 8.01  | 8.32  | 8.43  | 8.44  | 8.25  | 7.66  |
| 10544525 | Pdia4         | 0.0758 | 16.97 | 10.14 | 10.02 | 10.01 | 10.27 | 10.64 | 10.36 |
| 10405755 | ---           | 0.0765 | 20.89 | 7.91  | 7.71  | 7.41  | 7.61  | 7.94  | 8.05  |
| 10522208 | Uchl1         | 0.0765 | 7.18  | 6.10  | 6.37  | 6.55  | 6.27  | 6.13  | 6.06  |
| 10592449 | Olfrl149      | 0.0765 | 0.62  | 5.41  | 5.20  | 5.08  | 4.87  | 5.28  | 5.13  |
| 10574572 | 2210023G05Rik | 0.0769 | 6.63  | 7.20  | 7.40  | 7.35  | 7.33  | 7.09  | 6.76  |
| 10544588 | Gimap3        | 0.0775 | 10.34 | 4.82  | 4.88  | 5.13  | 5.34  | 4.95  | 4.63  |
| 10435791 | ---           | 0.0777 | 8.09  | 7.82  | 8.19  | 8.19  | 8.16  | 8.20  | 7.81  |
| 10356240 | Slc16a14      | 0.0784 | 13.54 | 8.78  | 9.01  | 9.06  | 9.60  | 10.07 | 9.09  |
| 10432398 | Tuba1b        | 0.0790 | 19.35 | 10.96 | 10.73 | 10.69 | 10.82 | 10.86 | 11.17 |
| 10565819 | Slco2b1       | 0.0798 | 11.91 | 7.53  | 7.70  | 7.87  | 8.12  | 8.21  | 7.71  |
| 10363173 | Gja1          | 0.0810 | 8.57  | 6.68  | 6.93  | 7.07  | 6.92  | 6.98  | 6.66  |
| 10545086 | Snca          | 0.0810 | 3.79  | 6.91  | 7.08  | 6.95  | 6.66  | 6.75  | 6.75  |
| 10501608 | Vcam1         | 0.0810 | 13.07 | 7.15  | 7.27  | 7.39  | 7.60  | 7.90  | 7.34  |
| 10504137 | 4933409K07Rik | 0.0810 | 12.57 | 7.07  | 7.12  | 7.31  | 7.71  | 7.93  | 7.17  |
| 10504201 | 4933409K07Rik | 0.0810 | 12.57 | 7.07  | 7.12  | 7.31  | 7.71  | 7.93  | 7.17  |
| 10512350 | 4933409K07Rik | 0.0810 | 12.57 | 7.07  | 7.12  | 7.31  | 7.71  | 7.93  | 7.17  |
| 10512352 | 4933409K07Rik | 0.0810 | 12.57 | 7.07  | 7.12  | 7.31  | 7.71  | 7.93  | 7.17  |
| 10359113 | Fam163a       | 0.0810 | 17.19 | 7.43  | 7.31  | 7.22  | 7.54  | 7.46  | 7.65  |
| 10597592 | Acaa1b        | 0.0810 | 9.41  | 9.17  | 9.39  | 9.47  | 9.48  | 9.45  | 9.12  |
| 10460072 | Cndp1         | 0.0810 | 8.25  | 9.22  | 9.23  | 9.58  | 9.49  | 9.18  | 8.78  |
| 10558961 | Tspan4        | 0.0810 | 9.90  | 8.32  | 8.63  | 8.89  | 8.89  | 9.34  | 8.39  |
| 10542953 | Tfpi2         | 0.0810 | 21.14 | 8.97  | 8.73  | 8.61  | 8.59  | 8.40  | 9.00  |
| 10512739 | Xpa           | 0.0821 | 4.52  | 7.90  | 8.08  | 8.06  | 7.74  | 7.47  | 7.80  |
| 10592058 | Tuba1b        | 0.0824 | 19.01 | 10.96 | 10.71 | 10.70 | 10.85 | 10.92 | 11.16 |
| 10544932 | Inmt          | 0.0824 | 8.53  | 12.37 | 12.51 | 12.80 | 12.72 | 12.89 | 11.79 |
| 10395389 | Sostdc1       | 0.0825 | 22.36 | 10.55 | 10.33 | 10.21 | 10.09 | 9.95  | 10.67 |
| 10449452 | Fkbp5         | 0.0825 | 11.84 | 8.40  | 8.55  | 8.87  | 9.36  | 9.62  | 8.52  |
| 10529824 | Prom1         | 0.0849 | 20.71 | 8.92  | 8.69  | 8.53  | 8.46  | 8.23  | 9.15  |
| 10390691 | Nr1d1         | 0.0849 | 4.35  | 8.60  | 8.72  | 8.51  | 7.82  | 7.55  | 7.49  |
| 10441718 | Park2         | 0.0849 | 7.79  | 6.55  | 6.58  | 6.82  | 6.75  | 6.52  | 6.23  |
| 10562548 | C80913        | 0.0849 | 6.55  | 8.21  | 8.43  | 8.49  | 8.28  | 8.33  | 8.15  |
| 10349932 | Etnk2         | 0.0859 | 8.75  | 5.35  | 5.65  | 5.88  | 5.80  | 5.99  | 5.29  |
| 10349571 | Fcamr         | 0.0865 | 7.42  | 7.74  | 8.09  | 8.24  | 7.97  | 7.13  | 6.71  |
| 10503497 | Slc7a13       | 0.0874 | 9.28  | 12.11 | 12.33 | 12.47 | 12.46 | 12.55 | 11.98 |
| 10545877 | Cml4          | 0.0874 | 8.95  | 9.60  | 9.69  | 10.10 | 10.38 | 10.71 | 8.77  |
| 10391649 | Slc4a1        | 0.0880 | 20.45 | 8.32  | 8.19  | 8.09  | 8.07  | 7.93  | 8.49  |

|          |               |        |       |       |       |       |       |       |       |
|----------|---------------|--------|-------|-------|-------|-------|-------|-------|-------|
| 10527936 | Fzd1          | 0.0880 | 0.12  | 9.14  | 9.05  | 8.91  | 8.74  | 8.79  | 9.03  |
| 10504375 | Npr2          | 0.0889 | 7.53  | 7.27  | 7.67  | 7.67  | 7.59  | 7.60  | 7.14  |
| 10597817 | Cck           | 0.0903 | 17.20 | 7.44  | 7.08  | 7.22  | 7.46  | 8.00  | 7.51  |
| 10519555 | Abcb1b        | 0.0903 | 5.26  | 7.43  | 7.69  | 7.64  | 7.27  | 6.08  | 7.16  |
| 10364222 | Ftcd          | 0.0906 | 8.59  | 6.94  | 7.20  | 7.34  | 7.33  | 7.56  | 6.47  |
| 10471737 | ---           | 0.0908 | 22.98 | 3.03  | 2.90  | 2.73  | 2.70  | 3.24  | 2.95  |
| 10431872 | Slc38a1       | 0.0908 | 21.02 | 4.95  | 4.67  | 4.64  | 4.55  | 4.34  | 5.18  |
| 10455457 | Npy6r         | 0.0909 | 16.47 | 4.85  | 4.56  | 4.64  | 5.18  | 4.32  | 5.14  |
| 10598863 | Rgn           | 0.0914 | 7.02  | 5.73  | 5.92  | 5.96  | 5.82  | 5.61  | 5.40  |
| 10518781 | Per3          | 0.0926 | 8.31  | 5.93  | 6.39  | 6.77  | 6.62  | 7.06  | 5.83  |
| 10426650 | Tuba1c        | 0.0926 | 19.25 | 10.94 | 10.72 | 10.67 | 10.81 | 10.88 | 11.13 |
| 10535904 | Hsph1         | 0.0934 | 14.13 | 9.94  | 9.84  | 10.03 | 10.36 | 10.85 | 10.01 |
| 10409278 | Nfil3         | 0.0934 | 17.33 | 7.58  | 7.18  | 7.22  | 7.84  | 7.37  | 8.09  |
| 10412345 | Parp8         | 0.0934 | 7.80  | 8.14  | 8.32  | 8.34  | 8.32  | 8.22  | 7.89  |
| 10447921 | ---           | 0.0934 | 7.23  | 2.47  | 2.59  | 2.70  | 2.54  | 2.45  | 2.27  |
| 10488029 | Zfand1        | 0.0934 | 5.57  | 9.39  | 9.47  | 9.53  | 9.30  | 9.09  | 9.15  |
| 10575867 | Mlycd         | 0.0967 | 8.48  | 7.28  | 7.49  | 7.58  | 7.50  | 7.44  | 7.20  |
| 10497636 | ---           | 0.0967 | 3.24  | 7.57  | 7.68  | 7.59  | 7.23  | 6.90  | 7.41  |
| 10355205 | D630023F18Rik | 0.0967 | 0.34  | 10.44 | 10.34 | 10.17 | 10.03 | 9.86  | 10.33 |
| 10466304 | Dtx4          | 0.0967 | 20.61 | 8.45  | 8.21  | 7.79  | 7.98  | 7.69  | 8.52  |
| 10514221 | Plin2         | 0.0967 | 6.93  | 9.95  | 10.04 | 10.10 | 9.99  | 10.12 | 9.70  |
| 10428338 | Dpys          | 0.0967 | 7.44  | 8.10  | 8.34  | 8.46  | 8.30  | 7.77  | 7.59  |
| 10399198 | Ncoa4         | 0.0967 | 10.68 | 10.32 | 10.41 | 10.55 | 10.59 | 10.64 | 10.32 |
| 10347741 | Mogat1        | 0.0972 | 7.81  | 9.56  | 9.80  | 9.90  | 9.98  | 9.95  | 8.41  |
| 10525439 | P2rx4         | 0.0973 | 6.57  | 8.87  | 9.02  | 8.97  | 8.94  | 8.80  | 8.63  |
| 10422244 | Slitrk6       | 0.0974 | 9.96  | 4.82  | 5.19  | 5.41  | 5.76  | 5.55  | 4.72  |
| 10380524 | Slc35b1       | 0.0976 | 17.78 | 9.03  | 8.84  | 8.81  | 9.08  | 9.35  | 9.20  |
| 10518532 | Tardbp        | 0.0977 | 16.86 | 9.23  | 9.08  | 9.13  | 9.32  | 9.51  | 9.37  |
| 10526363 | Por           | 0.0978 | 8.76  | 10.51 | 10.63 | 10.74 | 10.74 | 10.78 | 10.31 |
| 10509204 | Tcea3         | 0.0984 | 6.66  | 8.87  | 8.97  | 8.98  | 8.95  | 8.79  | 8.62  |
| 10480003 | Itih2         | 0.0987 | 8.39  | 6.62  | 7.04  | 7.05  | 7.09  | 7.11  | 6.08  |
| 10355954 | BC035947      | 0.0989 | 8.33  | 8.18  | 8.62  | 8.59  | 8.69  | 8.55  | 7.53  |
| 10523128 | Ppbp          | 0.0995 | 3.39  | 5.89  | 6.12  | 5.35  | 5.20  | 5.63  | 4.97  |
| 10553403 | Htatip2       | 0.0995 | 7.54  | 7.46  | 7.78  | 7.74  | 7.74  | 7.60  | 7.04  |

**Supplementary Table 3.** Differentially expressed transcripts between *clock*-knockout and wild-type mice with a FDR<10% and a fold change > 50%.

| Average Expression |               |        |             |         |
|--------------------|---------------|--------|-------------|---------|
| Probe ID           | Symbol        | FDR    | Fold Change | A-value |
| 10604576           | Gpc3          | 0.0000 | 1.72        | 8.54    |
| 10500570           | Hao2          | 0.0000 | 2.07        | 11.04   |
| 10506125           | Angptl3       | 0.0000 | 1.89        | 7.64    |
| 10519555           | Abcb1b        | 0.0000 | 2.07        | 6.88    |
| 10531149           | Gc            | 0.0000 | 2.16        | 10.25   |
| 10531073           | Ugt2b38       | 0.0000 | -13.36      | 10.04   |
| 10445293           | Pla2g7        | 0.0000 | 1.92        | 8.85    |
| 10367059           | BC089597      | 0.0001 | 1.72        | 9.99    |
| 10522335           | Atp10d        | 0.0001 | 2.27        | 7.69    |
| 10467897           | Cyp2c44       | 0.0001 | 1.65        | 9.52    |
| 10531034           | Ugt2b34       | 0.0001 | 1.75        | 9.30    |
| 10423030           | Prlr          | 0.0001 | 2.94        | 7.76    |
| 10580635           | Ces3          | 0.0001 | -1.92       | 10.79   |
| 10531057           | Ugt2b5        | 0.0001 | -2.59       | 8.19    |
| 10535841           | Slc46a3       | 0.0001 | -1.70       | 8.14    |
| 10498981           | Fgb           | 0.0001 | 1.89        | 6.42    |
| 10467887           | Cpn1          | 0.0001 | 1.57        | 9.99    |
| 10438769           | Cldn1         | 0.0001 | 1.62        | 7.95    |
| 10490867           | Slc7a12       | 0.0001 | 5.34        | 9.46    |
| 10355717           | Slc23a3       | 0.0001 | 1.53        | 6.99    |
| 10396831           | Arg2          | 0.0001 | 2.04        | 6.59    |
| 10607738           | Car5b         | 0.0001 | 1.54        | 10.80   |
| 10545874           | Cml5          | 0.0001 | -6.06       | 7.70    |
| 10423049           | Prlr          | 0.0001 | 3.31        | 7.39    |
| 10502240           | Npnt          | 0.0002 | 1.52        | 9.77    |
| 10512895           | Baat          | 0.0002 | 1.65        | 5.83    |
| 10389894           | Abcc3         | 0.0004 | 1.61        | 6.18    |
| 10439068           | Osta          | 0.0004 | -1.83       | 8.26    |
| 10556769           | Acsm3         | 0.0004 | -1.59       | 11.64   |
| 10366707           | Avpr1a        | 0.0004 | 1.65        | 8.62    |
| 10492735           | Fgg           | 0.0005 | 2.68        | 7.52    |
| 10364784           | Reep6         | 0.0005 | -1.54       | 8.69    |
| 10523062           | Alb           | 0.0005 | -1.96       | 6.32    |
| 10581664           | Il34          | 0.0006 | -1.55       | 7.51    |
| 10436967           | Cbr1          | 0.0008 | 1.51        | 9.40    |
| 10402195           | Tc2n          | 0.0008 | -1.80       | 6.36    |
| 10452879           | Nlrc4         | 0.0009 | -1.56       | 5.25    |
| 10467110           | AI747699      | 0.0010 | -1.53       | 8.91    |
| 10499906           | Smcp          | 0.0011 | -1.77       | 6.43    |
| 10578904           | Cpe           | 0.0013 | -1.75       | 8.50    |
| 10507152           | Cyp4a12b      | 0.0015 | -3.19       | 8.47    |
| 10545865           | Cml3          | 0.0015 | -1.97       | 10.17   |
| 10581865           | Ldhd          | 0.0016 | -1.64       | 10.91   |
| 10466659           | Gda           | 0.0016 | -1.60       | 6.29    |
| 10545869           | Cml3          | 0.0016 | -1.99       | 10.17   |
| 10545877           | Cml4          | 0.0017 | -1.81       | 10.10   |
| 10545862           | Cml3          | 0.0018 | -1.98       | 10.26   |
| 10548879           | Mgp           | 0.0018 | -1.66       | 9.02    |
| 10515187           | Cyp4a14       | 0.0018 | 2.51        | 10.27   |
| 10465753           | D630002G06Rik | 0.0022 | 1.83        | 7.09    |
| 10516064           | Mfsd2         | 0.0024 | -1.67       | 8.57    |
| 10465726           | BC014805      | 0.0024 | -2.23       | 7.42    |
| 10363224           | Fabp7         | 0.0025 | 1.81        | 7.04    |
| 10500360           | Gm15441       | 0.0029 | -2.04       | 6.00    |
| 10551226           | Cyp2a4        | 0.0029 | -3.51       | 10.18   |
| 10471912           | Kynu          | 0.0029 | 1.76        | 8.17    |
| 10507143           | Cyp4a12a      | 0.0040 | -3.93       | 8.13    |
| 10371400           | Cry1          | 0.0070 | 1.60        | 7.15    |
| 10362458           | Trdn          | 0.0071 | -1.68       | 3.68    |
| 10490989           | Cp            | 0.0073 | 1.51        | 9.06    |
| 10548207           | Pzp           | 0.0076 | -2.47       | 8.50    |
| 10496001           | Cfi           | 0.0079 | 1.64        | 7.05    |
| 10402390           | Serpina1b     | 0.0084 | -1.83       | 6.97    |
| 10365290           | Chst11        | 0.0085 | -1.50       | 7.67    |
| 10495035           | Slc16a1       | 0.0090 | 1.57        | 9.51    |
| 10427436           | C7            | 0.0092 | -1.50       | 7.53    |
| 10551282           | LOC100047728  | 0.0098 | -2.49       | 9.77    |

|          |         |        |       |       |
|----------|---------|--------|-------|-------|
| 10531061 | Ugt2b37 | 0.0102 | -2.48 | 9.90  |
| 10531066 | Ugt2a3  | 0.0181 | 2.10  | 7.03  |
| 10347741 | Mogat1  | 0.0200 | -1.50 | 9.80  |
| 10548978 | Slco1a1 | 0.0228 | -3.09 | 9.47  |
| 10556463 | Arntl   | 0.0246 | 1.95  | 7.69  |
| 10382189 | ApoH    | 0.0281 | -1.60 | 6.16  |
| 10417734 | Nr1d2   | 0.0316 | -1.54 | 8.71  |
| 10497381 | Cyp7b1  | 0.0399 | -2.22 | 10.57 |
| 10514478 | Cyp2j13 | 0.0657 | -1.76 | 10.77 |
| 10373452 | Gm129   | 0.0797 | -2.10 | 5.96  |
| 10490913 | Car3    | 0.0811 | -1.59 | 9.36  |
| 10345675 | Npas2   | 0.0832 | 1.66  | 7.07  |

fold change was calculated as the ratio of the maximal to minimal transcript abundance across the 24-hour circadian cycle.

**Supplementary Table 4.** KEGG pathway enriched among genes differentially expressed in *clock*-knockout mice.

| KEGG Pathway                                 | Count | Fold Enrichment | FDR    | Genes                                                         |
|----------------------------------------------|-------|-----------------|--------|---------------------------------------------------------------|
| Retinol metabolism                           | 7     | 15.37           | 0.0002 | Cyp4a12b, Cyp4a12a, Cyp2c44, Ugt2b34, Ugt2b5, Ugt2a3, Cyp4a14 |
| Arachidonic acid metabolism                  | 6     | 10.81           | 0.0039 | Cyp4a12b, Cyp2j13, Cbr1, Cyp4a12a, Cyp2c44, Cyp4a14           |
| Porphyrin and chlorophyll metabolism         | 4     | 18.74           | 0.0157 | Ugt2b34, Ugt2b5, Cp, Ugt2a3                                   |
| Complement and coagulation cascades          | 5     | 9.49            | 0.0171 | C7, Fgg, Serpina1b, Fgb, Cfi                                  |
| Circadian rhythm                             | 3     | 32.43           | 0.0296 | Npas2, Arntl, Cry1                                            |
| Steroid hormone biosynthesis                 | 4     | 12.49           | 0.0254 | Cyp7b1, Ugt2b34, Ugt2b5, Ugt2a3                               |
| Drug metabolism                              | 4     | 12.22           | 0.0232 | Ces3, Ugt2b34, Ugt2b5, Ugt2a3                                 |
| Ascorbate and aldarate metabolism            | 3     | 28.11           | 0.0248 | Ugt2b34, Ugt2b5, Ugt2a3                                       |
| Pentose and glucuronate interconversions     | 3     | 24.80           | 0.0282 | Ugt2b34, Ugt2b5, Ugt2a3                                       |
| Metabolism of xenobiotics by cytochrome P450 | 4     | 8.65            | 0.0424 | Cyp2c44, Ugt2b34, Ugt2b5, Ugt2a3                              |
| Drug metabolism                              | 4     | 7.70            | 0.0527 | Cyp2c44, Ugt2b34, Ugt2b5, Ugt2a3                              |
| PPAR signaling pathway                       | 4     | 7.40            | 0.0538 | Cyp4a12b, Cyp4a12a, Fabp7, Cyp4a14                            |
| Androgen and estrogen metabolism             | 3     | 12.78           | 0.0698 | Ugt2b34, Ugt2b5, Ugt2a3                                       |
| Starch and sucrose metabolism                | 3     | 11.71           | 0.0762 | Ugt2b34, Ugt2b5, Ugt2a3                                       |
| Fatty acid metabolism                        | 3     | 10.04           | 0.0942 | Cyp4a12b, Cyp4a12a, Cyp4a14                                   |

**Supplementary Table 5.** Nucleotide sequence homology between Cyp4a12a, Cyp4a12b, Cyp4a14 and other members of the CYP family\*.

|              | <b>Cyp4a12a</b>   | <b>Cyp4a12b</b>   | <b>Cyp4a14</b>    |
|--------------|-------------------|-------------------|-------------------|
|              | <b>% identity</b> | <b>% identity</b> | <b>% identity</b> |
| Cyp4a12a     | 100               | 98                | 78                |
| Cyp4a12b     | 98                | 100               | 78                |
| Cyp4a14      | 78                | 78                | 100               |
| Cyp4a10      | 81                | 81                |                   |
| Cyp4a32      | 80                | 80                |                   |
| Cyp4a31      | 80                | 80                |                   |
| Cyp4a29      | 77                | 77                | 77                |
| Cyp4a14-like | 83                | 82                | 85                |

\* -only sequences with >75% of identity have been introduced in the Table.

## Supplementary methods

**Microarrays expression profiling and data analysis** RNA from whole kidneys of wild-type or *clock* deficient mice was isolated with the standard method of Chomczynski and Sacchi<sup>1</sup>. The RNA quality was assessed on the Agilent 2100 bioanalyzer chips. RNA extracted from 2 or 3 mice was pooled and 100 ng of the mix was used to perform target preparation using the Whole Transcript Sense Target Labeling Protocol procedure (Affymetrix, High Wycombe, UK). 5.5µg of each fragmented cDNA was end-labeled with biotin and hybridized to a Mouse Gene 1.0 ST array (Affymetrix), then processed and scanned according to standard procedures. Normalized expression signals were calculated from Affymetrix CEL files using RMA normalization method implemented in the Affymetrix Expression Console software. Microarray hybridization was performed on two biological replicates. Data have been deposited in NCBI's Gene Expression Omnibus (GEO, <http://www.ncbi.nlm.nih.gov/geo/>) and are accessible through GEO Series accession number GSE27366. All subsequent statistical analyses were performed using R (R Core, 2004, <http://www.R-project.org>) and Bioconductor packages (<http://www.Bioconductor.org>). Linear models were implemented using Limma package<sup>2</sup>. One WT ZT8 microarray and one KO ZT16 microarray that did not pass the quality controls were removed from subsequent analysis. To identify circadian genes, we applied separately to WT and KO samples the following linear model:

$$Y_i = \mu + \cos\theta + \sin\theta + \varepsilon_i$$

where  $Y_i$  is the log2 expression for the probe set  $i$ , and the time was decomposed in  $\cos\theta$  and  $\sin\theta$  sinusoidal pairs with the periodicity corresponding to 24 hours.  $\theta$  was calculated as  $2*\pi*t/\tau$ , where  $t$  equals 0, 4, 8, 12, 16 or 20 h and  $\tau$  is the period of 24 h. The sin and cos factors were combined into one  $F$  test. The P values from the F-test

for the WT and KO samples were adjusted together using the Benjamini and Hochberg's method to calculate the false discovery rate (FDR). Probe sets with a FDR < 0.1 were considered as significant. To identify genes differentially affected in WT and KO, we applied the following linear model:

$$Y_i = \mu + T_j + G_k + \varepsilon_i,$$

where  $Y_i$  is the log2 expression for the probe set  $i$  at time  $T_j$ , in genotype condition (WT or KO)  $G_k$ . Specifically,  $\mu$  (the intercept) estimated the mean expression for WT mice at ZT0. P values calculated for the genotype factor were adjusted for multiple testing and probe sets with a FDR < 0.1 and an absolute fold change > 50% were considered significant. Pathway enrichment analysis was performed using DAVID (<http://david.abcc.ncifcrf.gov>).

1. Chomczynski, P, Sacchi, N: Single-step method of RNA isolation by acid guanidinium thiocyanate-phenol-chloroform extraction. *Anal Biochem*, 162: 156-159., 1987.
2. Wettenhall, JM, Smyth, GK: limmaGUI: a graphical user interface for linear modeling of microarray data. *Bioinformatics*, 20: 3705-3706, 2004.
